# Supplementary material for: Quality Control of Human Pluripotent Stem Cell Colonies by Computational Image Analysis Using Convolutional Neural Networks
Source: MDPI journal article supplement (doi:10.3390/ijms24010140), 2022-12-21
Supplement: s1 [file s1]

**Table S1.** Architectures (sequence of layers) of CNNs considered in the study. ‘ConvN1-N2’ denotes a convolutional layer with a kernel of size N1xN2; ‘maxpool N1 x N2’, max-pooling layer with a N1xN2 filter; ‘FC-N’, fully connected layer with N nodes; ‘skip connection’, connection that skips one or more layers; it performs an identity mapping and is added to the output of the convolutional layer; ‘sigmoid’, sigmoid activation function for a binary classification.

| CNN configuration                              |                        |                        |                        |                                           |
|------------------------------------------------|------------------------|------------------------|------------------------|-------------------------------------------|
| VGG13                                          | VGG13<br>FirstPool4    | VGG12                  | VGG12<br>FirstPool4    | Res+VGG13                                 |
| input: 256 x 256 RGB image                     |                        |                        |                        |                                           |
| conv3-16<br>conv3-16                           | conv3-16<br>conv3-16   | conv3-16<br>conv3-16   | conv3-16<br>conv3-16   | conv3-16<br>conv3-16<br>skip connection   |
| maxpool 2 x 2                                  | maxpool 4 x 4          | maxpool 2 x 2          | maxpool 4 x 4          | maxpool 2 x 2                             |
| conv3-32<br>conv3-32                           | conv3-32<br>conv3-32   | conv3-32<br>conv3-32   | conv3-32<br>conv3-32   | conv3-32<br>conv3-32<br>skip connection   |
| maxpool 2 x 2                                  |                        |                        |                        |                                           |
| conv3-64<br>conv3-64                           | conv3-64<br>conv3-64   | conv3-64<br>conv3-64   | conv3-64<br>conv3-64   | conv3-64<br>conv3-64<br>skip connection   |
| maxpool 2 x 2                                  |                        |                        |                        |                                           |
| conv3-128<br>conv3-128                         | conv3-128<br>conv3-128 | conv3-128<br>conv3-128 | conv3-128<br>conv3-128 | conv3-128<br>conv3-128<br>skip connection |
| maxpool 2 x 2                                  |                        |                        |                        |                                           |
| conv3-128<br>conv3-128                         | conv3-128<br>conv3-128 | conv3-128<br>conv3-128 | conv3-128<br>conv3-128 | conv3-128<br>conv3-128<br>skip connection |
| maxpool 2 x 2                                  |                        |                        |                        |                                           |
| conv3-128<br>conv3-128                         | conv3-128<br>conv3-128 | conv3-128              | conv3-128              | conv3-128<br>conv3-128<br>skip connection |
| maxpool 2 x 2                                  |                        |                        |                        |                                           |
| FC-512                                         | FC-128                 | FC-512                 | FC-128                 | FC-512                                    |
| output: sigmoid for classification probability |                        |                        |                        |                                           |
