# Supplementary material for: Quality Control of Human Pluripotent Stem Cell Colonies by Computational Image Analysis Using Convolutional Neural Networks
Source: Int J Mol Sci. 2022 Dec 21;24(1):140. doi: 10.3390/ijms24010140 (PMC9820636; doi:10.3390/ijms24010140)
Supplement: Supplementary file 1 [file ijms-24-00140-s001.zip › Table S2.xlsx]

## Sheet: DEP 1vs2
Table S2. List of differentially expressed proteins. The table contains Uniprot Majority protein IDs, Gene symbols, Protein names, fold change, and q-value for differentially expressed proteins (DEP) in in the experimental group 1 (good clonal cells) compared to group 2 (non-clonal colonies with sign of differentiation).
Majority protein IDs	Gene names	Protein names	FC_1vs2	Student's T-test q-value 1_2
Q9Y624	F11R	Junctional adhesion molecule A	0.327388	0
O00232	PSMD12	26S proteasome non-ATPase regulatory subunit 12	0.336774	0.007
Q13617;A0A0A0MTN0	CUL2	Cullin-2	0.34008	0
P17987;E7ERF2;E7EQR6;F5H282	TCP1	T-complex protein 1 subunit alpha	0.345211	0
P07919	UQCRH	Cytochrome b-c1 complex subunit 6, mitochondrial	0.347337	0.000363636
P62306	SNRPF	Small nuclear ribonucleoprotein F	0.349072	0.00833333
F8VXL2;F8VRV5;P63167	DYNLL1	Dynein light chain 1, cytoplasmic	0.349414	0.0106154
Q9UGP8	SEC63	Translocation protein SEC63 homolog	0.362452	0.0096
K7ERP4;A0A087X2I2;A0A087WT12;P36969;A0A087X247;K7EKX7;R4GNE4;K7ENB4;K7EJ20	GPX4	Glutathione peroxidase;Phospholipid hydroperoxide glutathione peroxidase, mitochondrial	0.368072	0.0182642
H7C3P6;P52948	NUP98	Nuclear pore complex protein Nup98-Nup96;Nuclear pore complex protein Nup98;Nuclear pore complex protein Nup96	0.369638	0.00685714
P61225	RAP2B	Ras-related protein Rap-2b	0.384748	0.0118571
Q92688	ANP32B	Acidic leucine-rich nuclear phosphoprotein 32 family member B	0.385927	0.0241967
J3KNQ3;Q9UNM6;A0A087WUL9;H0YD73;E9PL38	PSMD13	26S proteasome non-ATPase regulatory subunit 13	0.386701	0.0134194
P00505	GOT2	Aspartate aminotransferase, mitochondrial	0.388807	0.0204364
Q99832	CCT7	T-complex protein 1 subunit eta	0.389024	0.0211429
Q5QNZ2;P24539	ATP5F1	ATP synthase F(0) complex subunit B1, mitochondrial	0.398148	0
P13639	EEF2	Elongation factor 2	0.398895	0.023875
P09622;E9PEX6	DLD	Dihydrolipoyl dehydrogenase, mitochondrial;Dihydrolipoyl dehydrogenase	0.399578	0
Q9H3P7	ACBD3	Golgi resident protein GCP60	0.40079	0.0213333
Q5QPE8;Q9BQP7	MGME1	Mitochondrial genome maintenance exonuclease 1	0.401141	0.001
A0A7P0TB51;F6YB23;Q5T4U5;P11310;A0A7P0TB28;E9PRX4;A0A7P0T9W7;E9PJM9;A0A7P0TA39;A0A7P0TAB2;A0A7P0TBD1;A0A7P0T8J9;A0A7P0TA63;A0A7P0T932	ACADM	Medium-chain specific acyl-CoA dehydrogenase, mitochondrial	0.401586	0.00266667
H0Y938;H0YAC7;P35606;A0A7I2V258	COPB2	Coatomer subunit beta	0.403811	0.0238182
Q9NPH2;J3QS51	ISYNA1	Inositol-3-phosphate synthase 1	0.405933	0.0136471
P78527	PRKDC	DNA-dependent protein kinase catalytic subunit	0.406294	0
Q96DC8;Q5W0J8;Q5W0J6	ECHDC3	Enoyl-CoA hydratase domain-containing protein 3, mitochondrial	0.412016	0.0225517
Q15149;H0YDN1	PLEC	Plectin	0.412627	0.00275
A8MT72;Q2NKQ5;Q16799	RTN1	Reticulon;Reticulon-1	0.412707	0.0445333
Q2TAY7	SMU1	WD40 repeat-containing protein SMU1;WD40 repeat-containing protein SMU1, N-terminally processed	0.412763	0.0258082
Q9H9B4	SFXN1	Sideroflexin-1	0.413656	0.0150222
Q9NR31;H0Y5E8	SAR1A	GTP-binding protein SAR1a	0.413709	0.0305412
A0A2R8Y4F5;H0YFD6;P40939;A0A2R8YG21	HADHA	Trifunctional enzyme subunit alpha, mitochondrial;Long-chain enoyl-CoA hydratase;Long chain 3-hydroxyacyl-CoA dehydrogenase	0.414813	0
Q8TCS8	PNPT1	Polyribonucleotide nucleotidyltransferase 1, mitochondrial	0.415519	0.00673684
P27144;F8VS11	AK4	Adenylate kinase 4, mitochondrial	0.416456	0.0266486
P50991	CCT4	T-complex protein 1 subunit delta	0.421843	0.039375
Q92896	GLG1	Golgi apparatus protein 1	0.423442	0.014
P56381;Q5VTU8	ATP5E;ATP5EP2	ATP synthase subunit epsilon, mitochondrial;ATP synthase subunit epsilon-like protein, mitochondrial	0.423729	0.0102222
P13010	XRCC5	X-ray repair cross-complementing protein 5	0.42494	0.0374066
P30566;A0A7P0T8E4;A0A7P0Z472;A0A7P0T9A7;A0A096LNY6;A0A0A6YY92;A0A1B0GTJ7;A0A1B0GWJ0;A0A1B0GTG9;A0A1B0GWF8;A0A096LNY5;A0A096LP92;A0A096LNY4;A0A096LP72;B4DEP1	ADSL	Adenylosuccinate lyase	0.425728	0.0314023
P54709;C9J6S2	ATP1B3	Sodium/potassium-transporting ATPase subunit beta-3	0.426634	0.0296386
Q5T123;Q9H299	SH3BGRL3	SH3 domain-binding glutamic acid-rich-like protein 3	0.431441	0.0146667
Q9NZM5	GLTSCR2	Glioma tumor suppressor candidate region gene 2 protein	0.433064	0.0264737
Q9NWY4;A8MVJ9	C4orf27	UPF0609 protein C4orf27;Putative UPF0609 protein C4orf27-like	0.437657	0.0413878
Q9NS69	TOMM22	Mitochondrial import receptor subunit TOM22 homolog	0.437923	0.0326818
O43598;H0Y8X4	DNPH1	2-deoxynucleoside 5-phosphate N-hydrolase 1	0.438449	0.02795
K7EJE8;K7EKE6;P36776;K7ER27	LONP1	Lon protease homolog, mitochondrial	0.439264	0.0143784
B4DUR8;P49368	CCT3	T-complex protein 1 subunit gamma	0.440217	0.0273418
P51153;A0A087WWB9	RAB13	Ras-related protein Rab-13	0.445543	0.0288395
O94808	GFPT2	Glutamine--fructose-6-phosphate aminotransferase [isomerizing] 2	0.446576	0.0234783
E9PFN5;Q9Y2Q3	GSTK1	Glutathione S-transferase kappa 1	0.447973	0.0416162
P50990	CCT8	T-complex protein 1 subunit theta	0.449285	0.0392842
Q9H4A6;D6REM1	GOLPH3	Golgi phosphoprotein 3	0.449656	0.0234118
Q9NSD9	FARSB	Phenylalanine--tRNA ligase beta subunit	0.450683	0.0442745
Q9UI30;F5GYQ2;F5GX77	TRMT112	Multifunctional methyltransferase subunit TRM112-like protein	0.451117	0.0232571
P28838	LAP3	Cytosol aminopeptidase	0.456722	0.0274805
C9K0U8;A0A0G2JLD8;E7EUY5;Q04837	SSBP1	Single-stranded DNA-binding protein, mitochondrial	0.459045	0.0132571
P48444;B0YIW6;Q6P1Q5	ARCN1	Coatomer subunit delta	0.462248	0.0238769
Q14692	BMS1	Ribosome biogenesis protein BMS1 homolog	0.464669	0.0288293
A0A087WUT6;O60841	EIF5B	Eukaryotic translation initiation factor 5B	0.470465	0.0387527
P36542	ATP5C1	ATP synthase subunit gamma, mitochondrial	0.476389	0.0359551
O95782	AP2A1	AP-2 complex subunit alpha-1	0.478717	0.0496667
O43747	AP1G1	AP-1 complex subunit gamma-1	0.480069	0.04212
Q00325;F8VVM2	SLC25A3	Phosphate carrier protein, mitochondrial	0.495715	0.0177872
O94826	TOMM70A	Mitochondrial import receptor subunit TOM70	0.496307	0.0237612
Q15417	CNN3	Calponin-3	2.0135	0.00577778
Q9BQI0;Q5JUP3;H7C605	AIF1L	Allograft inflammatory factor 1-like	2.03948	0.0237333
P49327;A0A0U1RQF0	FASN	Fatty acid synthase;[Acyl-carrier-protein] S-acetyltransferase;[Acyl-carrier-protein] S-malonyltransferase;3-oxoacyl-[acyl-carrier-protein] synthase;3-oxoacyl-[acyl-carrier-protein] reductase;3-hydroxyacyl-[acyl-carrier-protein] dehydratase;Enoyl-[acyl-carrier-protein] reductase;Oleoyl-[acyl-carrier-protein] hydrolase	2.05356	0
Q9BQ61;K7ELS0;K7ERU7;K7EN60	C19orf43	Uncharacterized protein C19orf43	2.08147	0.0174167
P55072;A0A7P0TAW3;A0A7I2V540;C9JUP7;A0A7P0T8A3;A0A7P0T8Q5;A0A7P0TAQ1;A0A7P0Z4C6;A0A7I2V2Y2	VCP	Transitional endoplasmic reticulum ATPase	2.18519	0.013875
H3BMS0;H3BMM9;H3BTC0;Q15287;H3BV80	RNPS1	RNA-binding protein with serine-rich domain 1	2.22352	0.0498113
Q99733;E9PNW0;E9PJJ2;E9PS34;E9PNJ7;A8MXH2;C9J6D1;C9JZI7;E9PKT8	NAP1L4	Nucleosome assembly protein 1-like 4	2.26198	0.0153488
A0A0G2JNH2;A0A7I2V5U5;G5E9E7;A0A087X0K9;G3V1L9;Q07157	TJP1	Tight junction protein ZO-1	2.32448	0.0495701
E7EX17;P23588;F8VX11	EIF4B	Eukaryotic translation initiation factor 4B	2.38814	0.0157391
O75937	DNAJC8	DnaJ homolog subfamily C member 8	2.40358	0.0122759
A0A0C4DFV9;Q01105;P0DME0	SET;SETSIP	Protein SET;Protein SETSIP	2.41066	0.024338
F2Z337;F2Z2F1;B0QYF8;P02144	MB	Myoglobin	2.45351	0.0274359
H0YJP0;A0A087X2H1;Q9ULT8;G3V4V5	HECTD1	E3 ubiquitin-protein ligase HECTD1	2.47013	0.0371739
P11047	LAMC1	Laminin subunit gamma-1	2.47957	0.039234
Q92598;A0A0A0MSM0	HSPH1	Heat shock protein 105 kDa	2.50121	0.002
A0A087WXB0;O15126;A0A087WTX8;A0A087WZA6;A0A087WU14	SCAMP1	Secretory carrier-associated membrane protein 1	2.5194	0.014
A0A2R8Y7M3;A0A2R8Y5S7;P35241	RDX	Radixin	2.56567	0.00282353
Q8NF37;A0A0G2JQ62;A0A0G2JRI7	LPCAT1	Lysophosphatidylcholine acyltransferase 1	2.59863	0.024254
Q02539	HIST1H1A	Histone H1.1	2.63271	0.0178462
F8VRR3;F8VQZ7;P50579	METAP2	Methionine aminopeptidase 2	2.66546	0.0144615
Q8WU90	ZC3H15	Zinc finger CCCH domain-containing protein 15	2.73858	0.0173061
Q13492;Q5T5P0;Q5T5P1;Q5T5P2	PICALM;KIAA1217	Phosphatidylinositol-binding clathrin assembly protein;Sickle tail protein homolog	2.75616	0.0141463
Q9NPJ3	ACOT13	Acyl-coenzyme A thioesterase 13;Acyl-coenzyme A thioesterase 13, N-terminally processed	2.79319	0.00781818
Q09028;H0YF10	RBBP4	Histone-binding protein RBBP4	2.86347	0.00184615
P12883	MYH7	Myosin-7	3.2053	0
